# Supplementary material for: An engineered oncolytic virus expressing PD-L1 inhibitors activates tumor neoantigen-specific T cell responses
Source: PubMed Central journal article supplement (PMC7070065; doi:10.1038/s41467-020-15229-5), 2020-03-13
Supplement: 41467_2020_15229_MOESM1_ESM.pdf [file 41467_2020_15229_MOESM1_ESM.pdf]

**Supplementary Information**

**An Engineered Oncolytic Virus Expressing PD-L1 Inhibitors Activates  
Tumor Neoantigen-Specific T Cell Responses**

Guan Wang et al.

## Supplementary Figure. 1

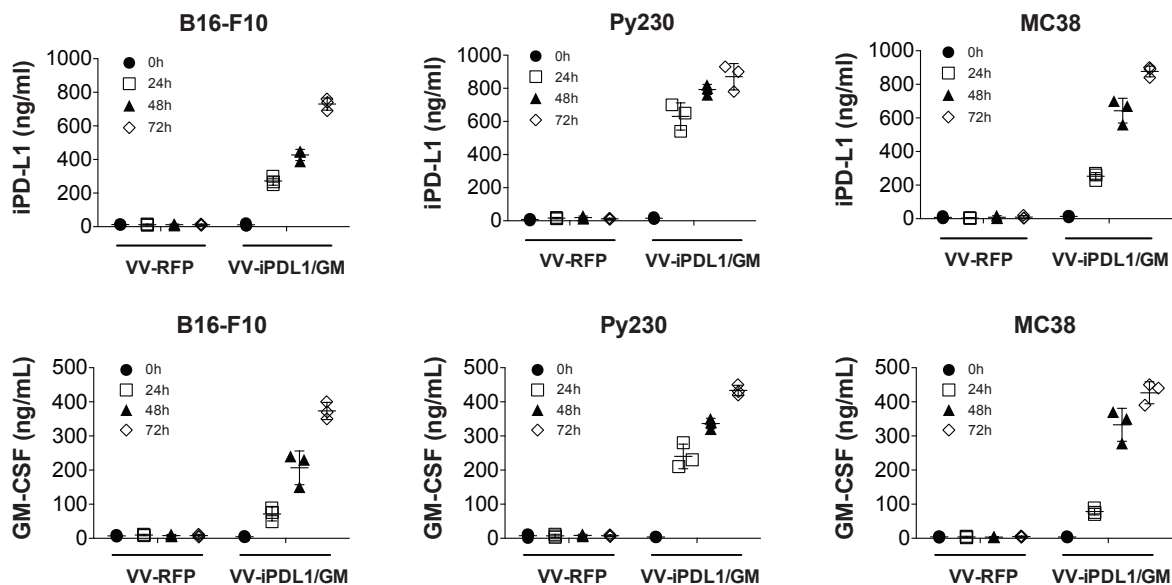

**Supplementary Figure 1. Efficient secretion of GM-CSF and PD-L1 inhibitors (iPD-L1) from VV-iPD-L1/GM-infected tumor cells.** B16-F10, Py230, or MC38 tumor cells were infected with VV-RFP or VV-iPD-L1/GM at an MOI=2. 24, 48, or 72 h after VV infection, supernatants were collected and clarified. iPD-L1 (PD1-Fc) was measured using mouse PD1 DuoSet ELISA kit (R&D, DY1021) and GM-CSF measured using mouse GM-CSF ELISA kit (Biolegend, Cat # 432204).  $n = 3$  independent samples. Data presented as the means  $\pm$  SD. The experiment was repeated twice.

## Supplementary Figure. 2

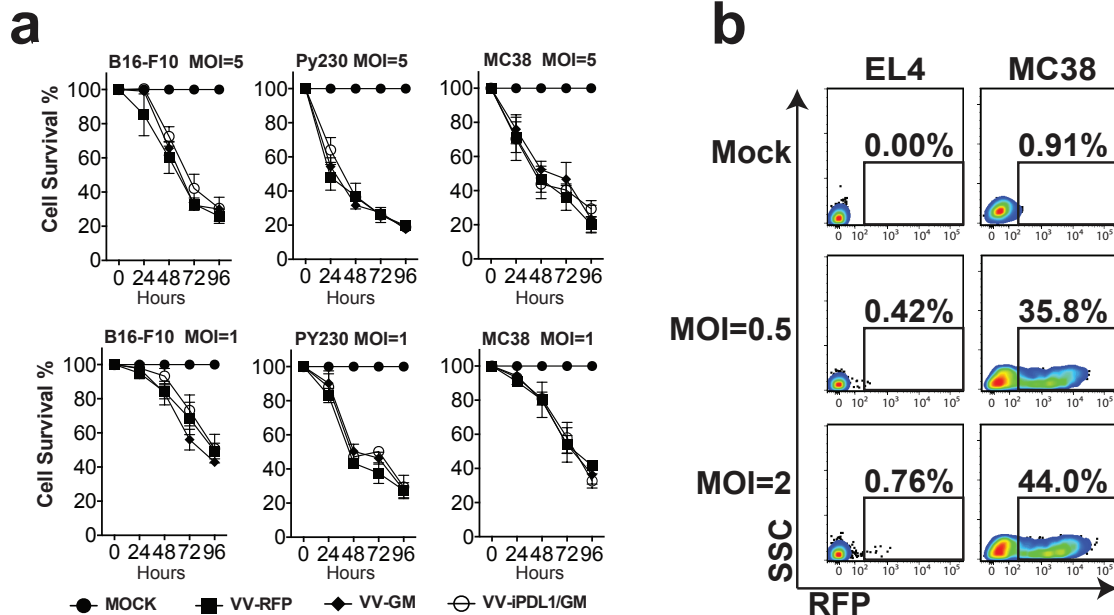

### Supplementary Figure 2. Oncolytic activities of the recombinant virus VV-iPDL1/GM.

(a) Oncolytic activity of VVs against different tumor cells. Mouse tumor cells (B16-F10, Py230, MC38) were infected with the indicated VVs at an MOI of 1 or 5 for 24, 48, 72, and 96 h. MTT assay were performed to determine viability of infected tumor cells. The percentages of viable cells are presented at different time points.  $n = 3$  independent samples. Data are presented as the means  $\pm$  SD. Experiments were repeated twice.

(b) VV efficiently infected MC38 tumor cells, but not EL-4 tumor cells. Tumor cells seeded in 24-well plate were infected with the indicated MOI of VV-iPDL1/GM. 48 h later, the cells were harvested and analyzed by flow cytometry. RFP positive cells represent infected cells. Experiments were repeated three times.

### Supplementary Figure. 3

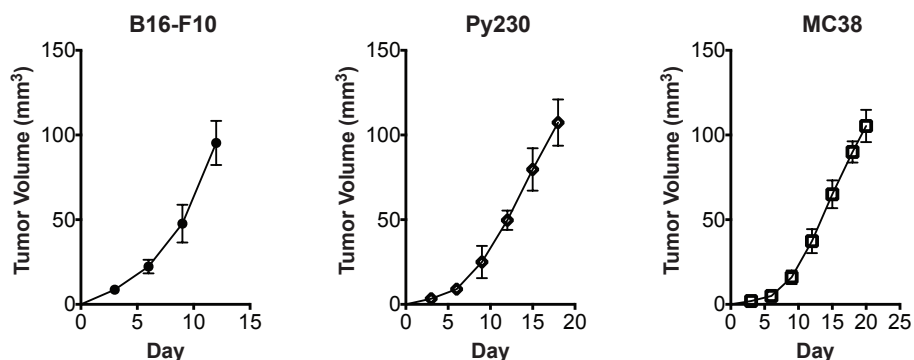

### Supplementary Figure 3. Representative tumor growth rates prior to virus treatment.

C57BL/6 mice were implanted with  $5 \times 10^5$  B16-F10, Py230, or MC38 cells subcutaneously. Tumor volume was monitored by caliper measurement on indicated days.  $n = 5$  mice. Data presented as the means  $\pm$  SD.

### Supplementary Figure. 4

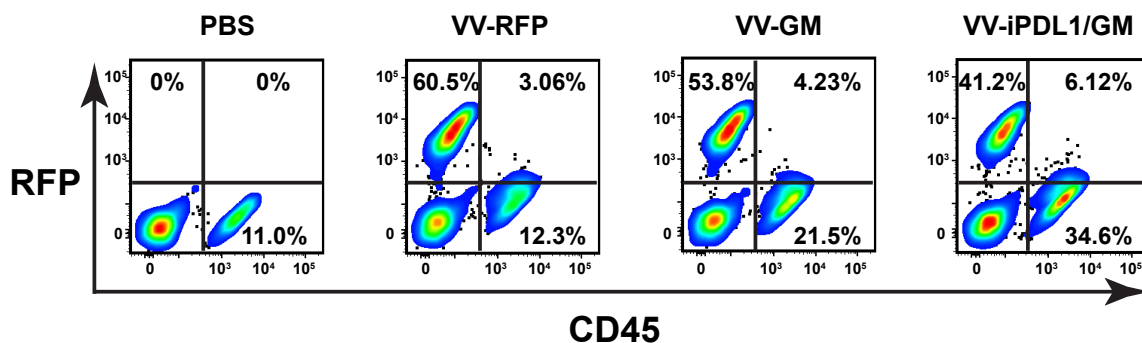

**Supplementary Figure 4. Both CD45 positive and negative cells in tumor microenvironment were infected with intratumorally injected viruses.** Groups of C57BL/6 mice were subcutaneously inoculated with MC38 cells ( $1 \times 10^6$ ). When tumor sizes reached  $\sim 100 \text{ mm}^3$  (counted as day 0), the tumors were intratumorally injected with 50  $\mu\text{L}$  of PBS, VV-RFP, VV-GM or VV-iPDL1/GM ( $5 \times 10^7$  pfu per tumor) on days 0 and 3. Two days post-2nd viral injection, VV-treated tumors were collected, weighed and digested with collagenase type I and DNase. A fraction of the tumor cell suspensions were blocked with anti-CD16/32 antibody and then stained with antibodies against CD45 to assess infected cells (RFP<sup>+</sup>) frequency of CD45 positive and negative cells.

### Supplementary Figure. 5

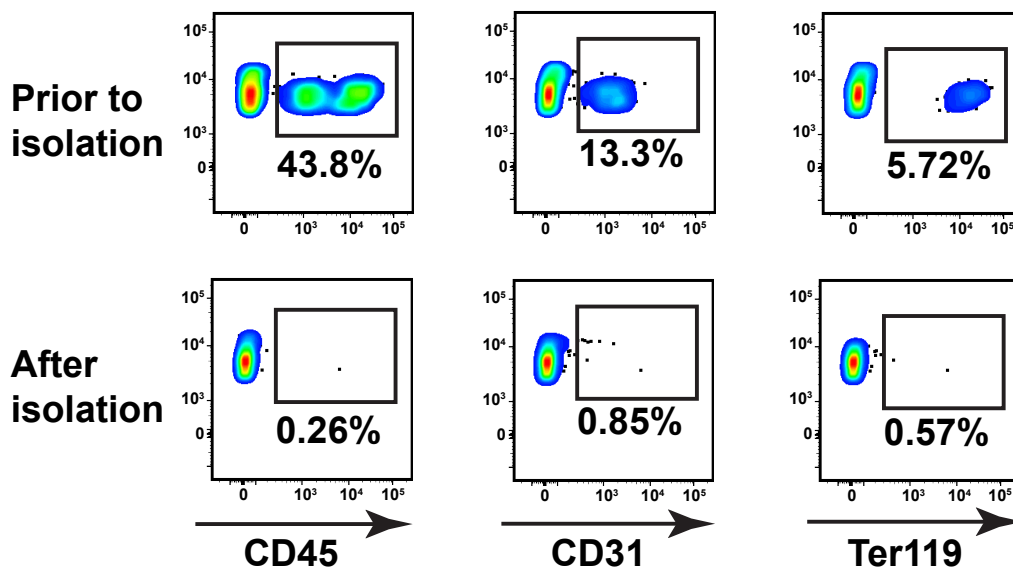

**Supplementary Figure 5. Tumor purity was confirmed by flow cytometry after kit isolation.**

Using the same treatment schedule as in Supplementary Figure 4, tumor cells were isolated from the other fraction of the tumor cell suspensions using a tumor cell isolation kit (Miltenyl Biotec, Cat# 130-110-187). The isolated tumor cells and tumor cell suspensions before isolation were stained with lineage markers anti-CD45, CD31, and Ter119 antibodies.

**Supplementary Figure. 6**

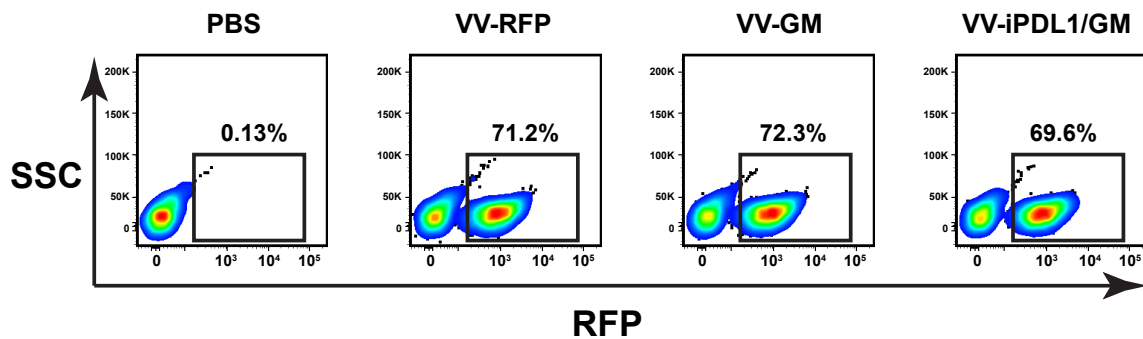

**Supplementary Figure 6. Tumor cells were infected by injected viruses.** Using the same treatment schedule as in Supplementary Figure 5, VV-infected cells (RFP<sup>+</sup>) frequencies of isolated tumor cells were analyzed by flow cytometry.

## Supplementary Figure. 7

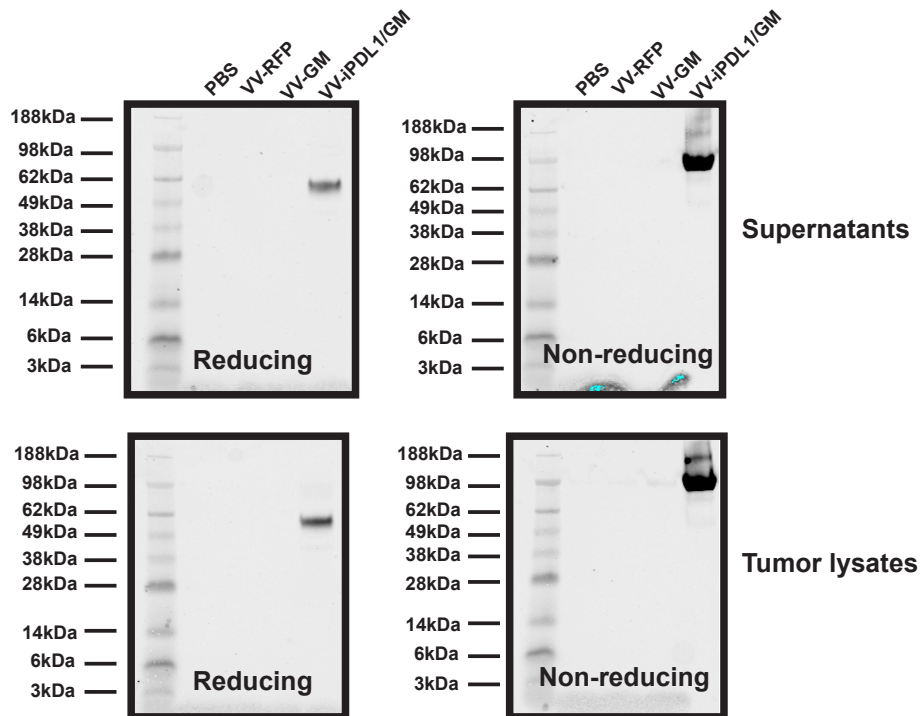

**Supplementary Figure 7. Infected tumor cells were able to secrete iPDL1.** Using the same treatment schedule as in Supplementary Figure 5, isolated tumor cells were further cultured *in vitro* for 48 h. Supernatants of the culture media and tumor cell lysates were analyzed by Western Blot using an anti-IgG Fc (Licor 926-32210) with reducing or non-reducing loading buffer. The experiment was repeated twice.

### Supplementary Figure. 8

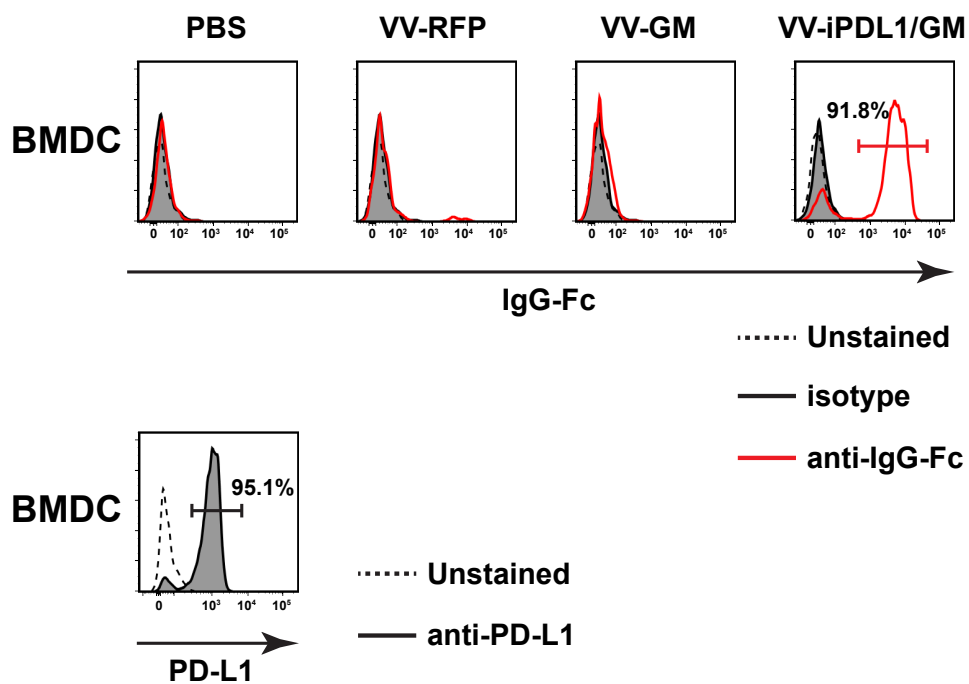

**Supplementary Figure 8. Secreted iPDL1 from infected isolated tumor cells binds to immune cells.** Mature bone marrow-derived dendritic cells (BMDC) were pre-treated with anti-CD16/32 antibodies to block FcRs binding on ice for 30 min. Cells were then incubated with the supernatants of the tumor cell culture media in Supplementary Figure 7, followed by stained anti-IgG-Fc or isotype IgG control. Mature BM-DC were also separately stained with anti-PD-L1.



## Supplementary Figure. 9

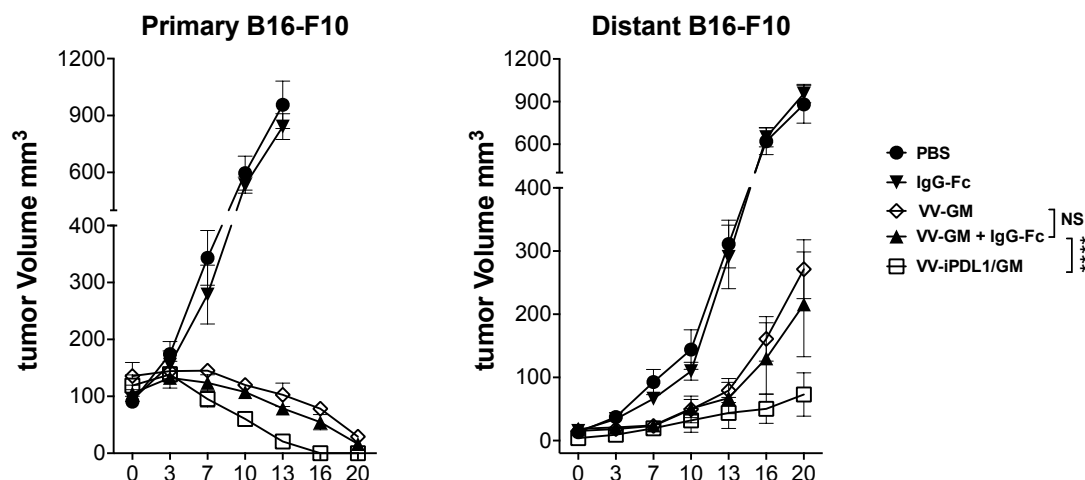

**Supplementary Figure 9. Comparison of antitumor activities of VV-iPDL1 with the co-administrations of VV-GM and IgG Fc.** B16-F10 melanoma cells were implanted to the left and right flanks of C57B/6 mice ( $5 \times 10^5$  to the left flank and  $1 \times 10^5$  to the right flank). When the volume of left flank tumors reached  $\sim 100 \text{ mm}^3$  (counted as day 0), the mice were intratumorally injected with  $50 \mu\text{L}$  of IgG-Fc ( $100 \mu\text{g}/\text{tumor}$ , Thermo, 31205) only, VV-GM ( $5 \times 10^7$  pfu/tumor), VV-GM ( $5 \times 10^7$  pfu/tumor) + IgG-Fc ( $100 \mu\text{g}/\text{tumor}$ ) (premixed and injected together), VV-iPDL1/GM ( $5 \times 10^7$  pfu/tumor), or PBS three times on days 0, 3, and 7. The left (treated) and right (untreated) flank tumor sizes were measured every 3-5 days.  $n = 5$  mice.  $*P < 0.05$  by repeated-measures 2-way ANOVA. The experiment was repeated once.

## Supplementary Figure. 10

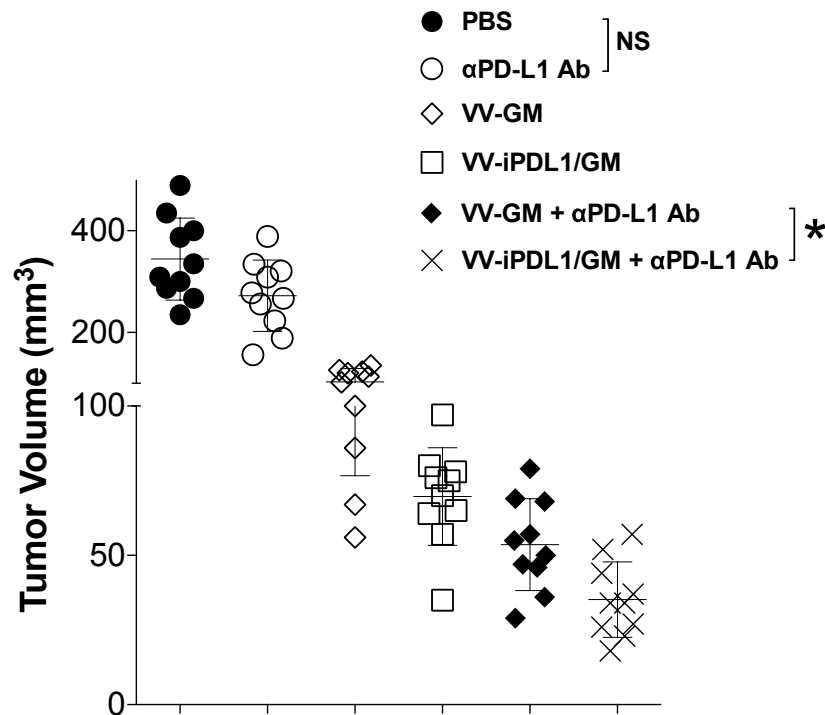

### Supplementary Figure 10. Distribution of tumor volumes on day 10 after virus injection.

Similar with B16-F10 tumor establishment in Figure 3a, the mice were intratumorally injected with 50  $\mu$ L of PBS, VV-GM, VV-iPDL1/GM ( $5 \times 10^7$  pfu per tumor) and 200  $\mu$ g/mouse anti-PDL1 antibody intravenously each time on day 0, 3, and 7.  $n = 10$  mice. Bars represent mean values  $\pm$  SD. \* $P < 0.05$  by two-tailed Mann-Whitney U test. The experiment was repeated once.

## Supplementary Figure.11

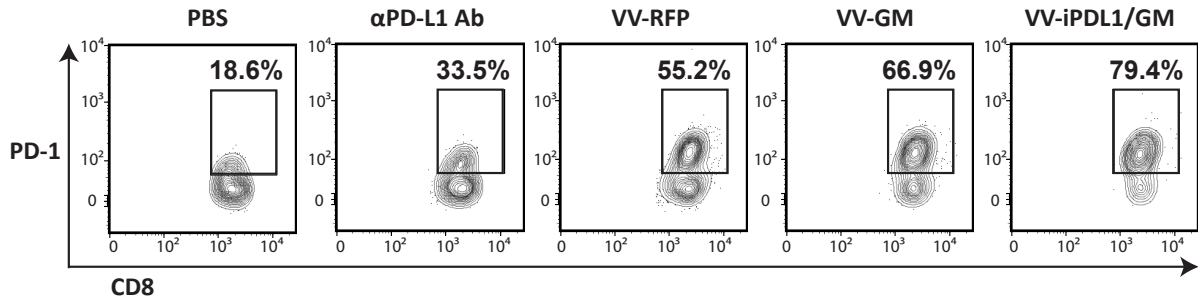

**Supplementary Figure 11. PD-1 expression of CD8+ T cell in virus-treated tumors.** A similar treatment schedule as in Figure 5a was used, VV-treated MC38 tumors were harvested, weighed and digested for preparation of single cell suspensions followed by antibody staining against CD45, CD3, CD8, or PD-1.

## Supplementary Figure. 12

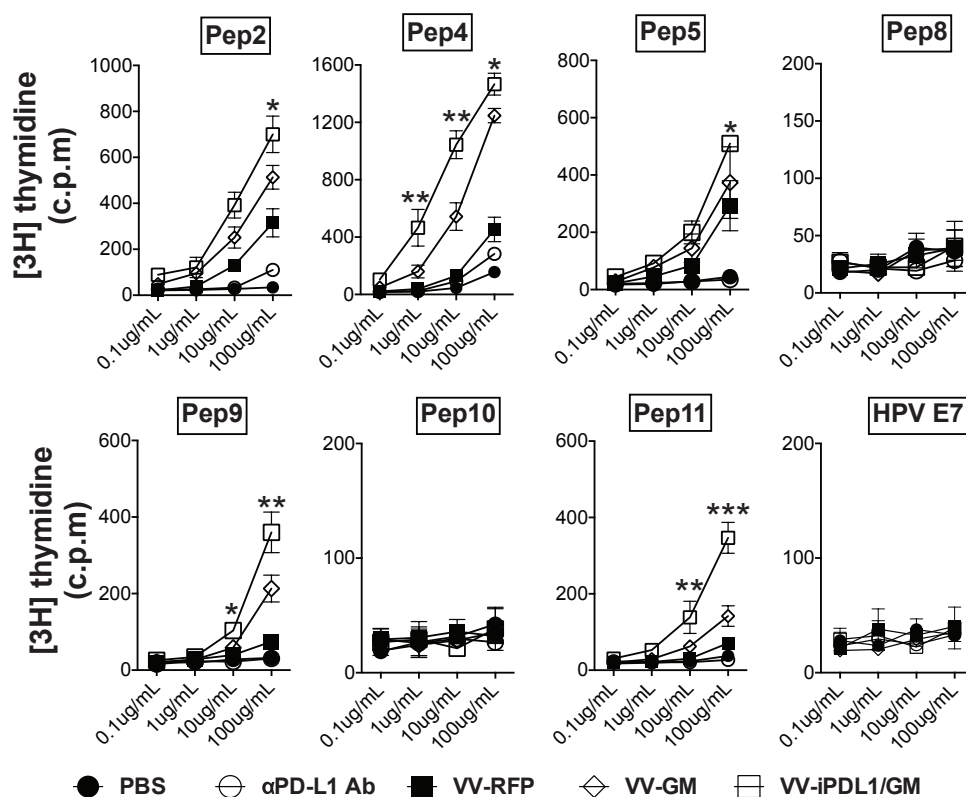

### Supplementary Figure. 12. Enhanced T cell responses against various neoantigen peptides.

MC38 tumor-bearing mice were intratumorally injected with PBS or various VVs as described in **Figure 6a**. The splenocytes from the VV-treated tumor-bearing mice were cultured in complete RPMI1640 in 96 well plates ( $1 \times 10^5$  per well) in the presence of one of indicated neoepitope peptides at various concentrations for 80 h. [<sup>3</sup>H]thymidine incorporation was measured.  $n = 3$  mice. Data presented as the means  $\pm$  SD. \* $P < 0.05$ , \*\* $P < 0.01$  by two-tailed Student's  $t$ -test.

### Supplementary Figure. 13

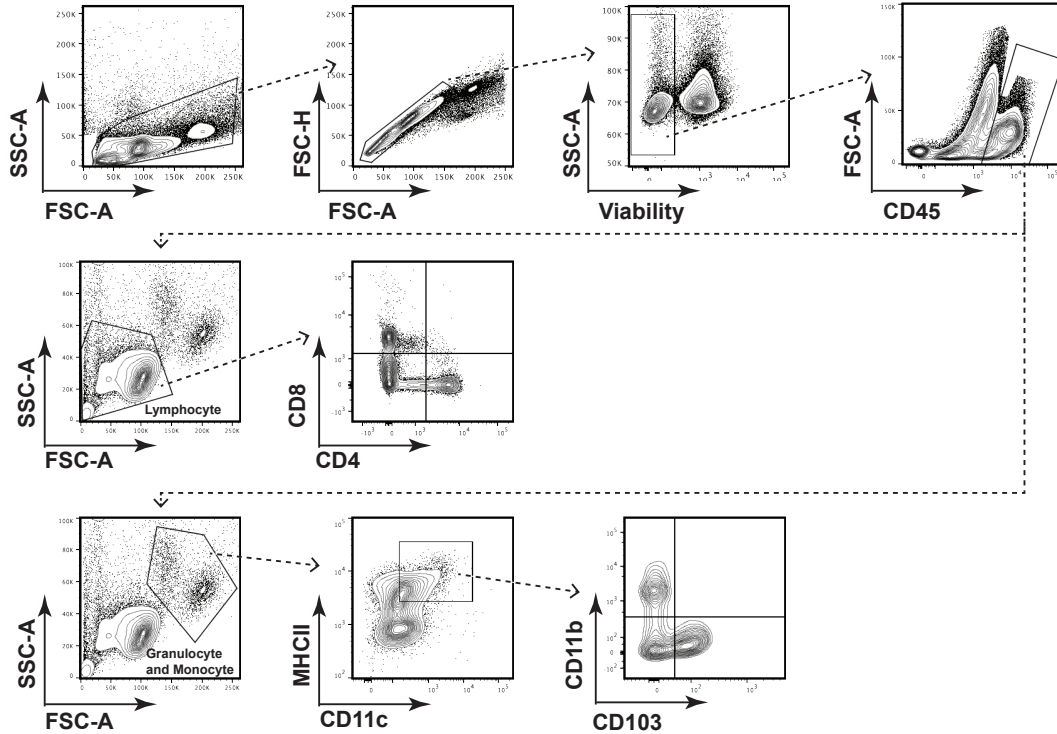

**Supplementary Figure. 13. Flow cytometric analysis of tumor-infiltrating cells.** Using the same treatment schedule as in **Figure. 5a**, tumor cell suspensions from VV treated mice were analysed by FACS. Gate strategy of CD4<sup>+</sup> or CD8<sup>+</sup> lymphocytes, and CD103<sup>+</sup> DCs.



## Supplementary Figure 15

### A. DNA sequence of iPDL1 fusion gene

5'-

tttaccggagtccegggagaagctcttagtcgtgtggtgattgtgcagaccctcgtggaccactgaacaggagtagctatttcttccacca  
gttcttctttccactctcagcttgctgtacatgaagtaagaacctcagagtcaggactgggtcagtggtcttagtttagctctgtttcccgtt  
gttggtccactccacgtaaatgtcttcaggcatgaagtctgtgacctgcaggtcagagtgacctgtttcttagtcacatcttcttctggtggagg  
caagacatatacctgtggagctcttactgacccttgggtttgagatggtctctcgcgatgggcgctgggaggtctttgttggtgacctgcattg  
aactcctgccaactcatccagtcctggtgctggatggggagggcactgaccacccggagagtactgttgaatcctctctatgggtttgtgtct  
gagctgtgtgacttccacgttgcacaaaccagctgatctggacatctgggtcctcctcgtcacatccaccaccacacatgtgactatggg  
gctcagggagatcatgagtacatccttgatcttggaggggaagatgaagacggatggtccaccaagaggttaggtgctgggcatttgcattg  
gaggacagggttgattgtgggccctctgggttgaaccggcctctggttggcgaggggctgggatatcttgttgaggtctccaggattc  
tctctgttaccacgagctctgctccagggctcctcgcattttgccttgggtgagggagatggccccacagaggtagatgccactgtcatt  
gcgccgtgtgcaaggatgtcatgtggaagtcatgcctgttgggcagctgtatgatctggaagcgggcacctggacgggttggctcaaac  
cattacagaaggcggcctgttttcagctctggtgctgggactcagcggttccagttcagcataagatctccgaccagttggacaagctgc  
aggtgaagggtggcatttgcctcctctgacactgtgagccaggctgggtagaagggtgagggacctccagggccattggggacaccttagaa  
gccaccctgattgccagctcaactgcagcacagcccaagtgaatgaccagggtacctgccggaccacat-3'

### B. Amino acid sequence of iPDL1

N'-

MWVRQVPWSFTWAVLQLSWQSGWLLEVPNGPWRSLTFYPAWLTVSEGANATFTCSLS  
NWSIDLMLNWNRLSPSNQTEKQAAFCNGLSQPVQDARFQIIQLPNRHDFHNMILDTRR  
NDSGIYLCGAISLHPKAKIEESPGAELVVTERILETSTRYPSPSPKPEGRFQPRGPTIKPCPP  
CKCPAPNLLGGPSVFIFPPKIKDVLMSLSPIVTCVVVDVSEDDPDVQISWVNNVEVHTA  
QTQTHREDYNSTLRVVSALPIQHQDWMSGKEFKCKVNNKDLPAPIERTISKPKGSVRAP  
QVYVLPPEEEMTKKQVTLTCMVTDFMPEDIYVEWTNNGKTELNYKNTEPVLDSGDSY  
FMYSKLRVEKKNWVERNSYSCSVVHEGLHNHHTTKSFSRTPGK\*

## Supplementary table I

| Name                     | Peptide       | MHC allele        | IC <sub>50</sub> (mutant) | IC <sub>50</sub> (Wild Type) |
|--------------------------|---------------|-------------------|---------------------------|------------------------------|
| Pep1                     | AALLNSA(G/V)L | H-2D <sup>b</sup> | 3nM                       | 52nM                         |
| Pep2                     | AQL(P/A)NDVVL | H-2D <sup>b</sup> | 9nM                       | 100nM                        |
| Pep3                     | MAPIDHT(A/T)M | H-2D <sup>b</sup> | 30nM                      | 102nM                        |
| Pep4                     | ASMTN(R/M)ELM | H-2D <sup>b</sup> | 2nM                       | 3nM                          |
| Pep5                     | SIIVFNL(V/L)  | H-2K <sup>b</sup> | 8nM                       | 34nM                         |
| Pep6                     | SSP(D/Y)SLHYL | H-2D <sup>b</sup> | 211nM                     | 685nM                        |
| Pep7                     | (S/I)MTQHLEPI | H-2D <sup>b</sup> | 78nM                      | 29nM                         |
| Pep8                     | SAIRSYQ(D/Y)V | H-2D <sup>b</sup> | 35nM                      | 755nM                        |
| Pep9                     | VSPVND(V/L)DV | H-2D <sup>b</sup> | 44nM                      | 18nM                         |
| Pep10                    | MG(G/V)MNRRI  | H-2D <sup>b</sup> | 77nM                      | 841nM                        |
| Pep11                    | FM(A/S)CNLLLV | H-2D <sup>b</sup> | 79nM                      | 24nM                         |
| HPV E7                   | YMLDLQPETT    | H-2D <sup>b</sup> | Irrelevant peptide        |                              |
| OVA <sub>(257-264)</sub> | SIINFEKL      | H-2K <sup>b</sup> | Irrelevant peptide        |                              |

**Supplementary Table I. Neoantigenic epitope peptides used in this study.**



## Supplementary Table 2

|        |                                |                               |
|--------|--------------------------------|-------------------------------|
| 18S    | 5'- cggctaccacatccaaggaa-3'    | 3'- gctggaattaccgcggct-5'     |
| Cxcl10 | 5'- gctgccgtcattttctgc-3'      | 3'- tctcaactggcccgtcatc-5'    |
| Calr   | 5'- aaaggaccctgatgctccaag-3'   | 3'- tgttcggtctcgttagggact-5'  |
| Cd74   | 5'- gctggatgaagcagtggctctt-3'  | 3'- ggtccttcttcagtcggttag-5'  |
| Hspa1b | 5'- acaagtcggagaacgtgcagga-3'  | 3'- gaagtggggatgagcctgttg-5'  |
| Hspa5  | 5'- tgtcttctcagcatcaagcaagg-3' | 3'- ttcggacaggtccttcacaacc-5' |
| Pdia4  | 5'- gaccagtttgaaggagcactc-3'   | 3'- acttcaggaggtgcctctacga-5' |
| Csf2   | 5'- aacctcctggatgacatgcctg-3'  | 3'- tcgtcccagatgccccgttaa-5'  |
| Fos    | 5'- gggaatggtgaagaccgtgtca-3'  | 3'- ccctgccttattctaccgacg-5'  |
| Map2k7 | 5'- tcaggtgtggaagatgcggttc-3'  | 3'- gaggctcgggtactgacggaa-5'  |
| Pdcd1  | 5'- cggttcaaggcatgggtcattgg-3' | 3'- ccttcgttctgctgtgagact-5'  |
| Pdcd11 | 5'- tgcggactacaagcgaatcacg-3'  | 3'- gctccaataggtcttcgactc-5'  |

**Supplementary Table 2. List of primer sequences.**
