# Supplementary material for: An engineered oncolytic virus expressing PD-L1 inhibitors activates tumor neoantigen-specific T cell responses
Source: PubMed Central journal article supplement (PMC7070065; doi:10.1038/s41467-020-15229-5), 2020-03-13
Supplement: 41467_2020_15229_MOESM2_ESM.pdf [file 41467_2020_15229_MOESM2_ESM.pdf]

## Reporting Summary

Nature Research wishes to improve the reproducibility of the work that we publish. This form provides structure for consistency and transparency in reporting. For further information on Nature Research policies, see [Authors & Referees](#) and the [Editorial Policy Checklist](#).

### Statistics

For all statistical analyses, confirm that the following items are present in the figure legend, table legend, main text, or Methods section.

n/a Confirmed

- |                                     |                                     |                                                                                                                                                                                                                                                            |
|-------------------------------------|-------------------------------------|------------------------------------------------------------------------------------------------------------------------------------------------------------------------------------------------------------------------------------------------------------|
| <input type="checkbox"/>            | <input checked="" type="checkbox"/> | The exact sample size ( $n$ ) for each experimental group/condition, given as a discrete number and unit of measurement                                                                                                                                    |
| <input type="checkbox"/>            | <input checked="" type="checkbox"/> | A statement on whether measurements were taken from distinct samples or whether the same sample was measured repeatedly                                                                                                                                    |
| <input type="checkbox"/>            | <input checked="" type="checkbox"/> | The statistical test(s) used AND whether they are one- or two-sided<br><i>Only common tests should be described solely by name; describe more complex techniques in the Methods section.</i>                                                               |
| <input checked="" type="checkbox"/> | <input type="checkbox"/>            | A description of all covariates tested                                                                                                                                                                                                                     |
| <input type="checkbox"/>            | <input checked="" type="checkbox"/> | A description of any assumptions or corrections, such as tests of normality and adjustment for multiple comparisons                                                                                                                                        |
| <input type="checkbox"/>            | <input checked="" type="checkbox"/> | A full description of the statistical parameters including central tendency (e.g. means) or other basic estimates (e.g. regression coefficient) AND variation (e.g. standard deviation) or associated estimates of uncertainty (e.g. confidence intervals) |
| <input type="checkbox"/>            | <input checked="" type="checkbox"/> | For null hypothesis testing, the test statistic (e.g. $F$ , $t$ , $r$ ) with confidence intervals, effect sizes, degrees of freedom and $P$ value noted<br><i>Give <math>P</math> values as exact values whenever suitable.</i>                            |
| <input checked="" type="checkbox"/> | <input type="checkbox"/>            | For Bayesian analysis, information on the choice of priors and Markov chain Monte Carlo settings                                                                                                                                                           |
| <input checked="" type="checkbox"/> | <input type="checkbox"/>            | For hierarchical and complex designs, identification of the appropriate level for tests and full reporting of outcomes                                                                                                                                     |
| <input checked="" type="checkbox"/> | <input type="checkbox"/>            | Estimates of effect sizes (e.g. Cohen's $d$ , Pearson's $r$ ), indicating how they were calculated                                                                                                                                                         |

*Our web collection on [statistics for biologists](#) contains articles on many of the points above.*

### Software and code

Policy information about [availability of computer code](#)

Data collection

Data analysis

For manuscripts utilizing custom algorithms or software that are central to the research but not yet described in published literature, software must be made available to editors/reviewers. We strongly encourage code deposition in a community repository (e.g. GitHub). See the Nature Research [guidelines for submitting code & software](#) for further information.

### Data

Policy information about [availability of data](#)

All manuscripts must include a [data availability statement](#). This statement should provide the following information, where applicable:

- Accession codes, unique identifiers, or web links for publicly available datasets
- A list of figures that have associated raw data
- A description of any restrictions on data availability

### Field-specific reporting

Please select the one below that is the best fit for your research. If you are not sure, read the appropriate sections before making your selection.

# Life sciences study design

All studies must disclose on these points even when the disclosure is negative.

|                 |                                                                                                                                                                                                                                                                                                                                                                                                                                                                                  |
|-----------------|----------------------------------------------------------------------------------------------------------------------------------------------------------------------------------------------------------------------------------------------------------------------------------------------------------------------------------------------------------------------------------------------------------------------------------------------------------------------------------|
| Sample size     | Group size was based on previous experience. For example, Experiments were performed in biological triplicates n=3 unless otherwise noted. And sample size of at least 5 mice in each group was widely accepted in life science experiment to support the consistency of the data and conclusion. No statistical method was used to predetermine sample size                                                                                                                     |
| Data exclusions | No data was excluded. In Figure 3, when tumors reach >1000 mm <sup>3</sup> , the mice were euthanized in accordance with the guidelines of the Institutional Animal Care and Use Committee of USC.                                                                                                                                                                                                                                                                               |
| Replication     | All attempts at replication were successful, and standard deviations were within expected ranges. Unless otherwise noted, each experiment was repeated three or more times.                                                                                                                                                                                                                                                                                                      |
| Randomization   | After tumor injection when tumor size reached about 100mm <sup>3</sup> , all mice were allocated randomly for each group. And within animal controls were performed wherever possible. And the possible confounders 'experimenter' and 'day of experiment' were equally matched between groups. For experiments other than mice studies, randomization is irrelevant to our study, because different groups were defined by either different cell lines or different conditions. |
| Blinding        | For all in vitro or vivo experiments whose data were generated by machine reading, blinding or not won't affect the results. For caliper measurement of tumor size, different people were involved in measuring even they were aware of group labeling which was conducted partially blinded.                                                                                                                                                                                    |

# Reporting for specific materials, systems and methods

We require information from authors about some types of materials, experimental systems and methods used in many studies. Here, indicate whether each material, system or method listed is relevant to your study. If you are not sure if a list item applies to your research, read the appropriate section before selecting a response.

## Materials & experimental systems

| n/a                                 | Involvement                         | Involved in the study       |
|-------------------------------------|-------------------------------------|-----------------------------|
| <input type="checkbox"/>            | <input checked="" type="checkbox"/> | Antibodies                  |
| <input type="checkbox"/>            | <input checked="" type="checkbox"/> | Eukaryotic cell lines       |
| <input checked="" type="checkbox"/> | <input type="checkbox"/>            | Palaeontology               |
| <input type="checkbox"/>            | <input checked="" type="checkbox"/> | Animals and other organisms |
| <input checked="" type="checkbox"/> | <input type="checkbox"/>            | Human research participants |
| <input checked="" type="checkbox"/> | <input type="checkbox"/>            | Clinical data               |

## Methods

| n/a                                 | Involvement                         | Involved in the study  |
|-------------------------------------|-------------------------------------|------------------------|
| <input checked="" type="checkbox"/> | <input type="checkbox"/>            | ChIP-seq               |
| <input type="checkbox"/>            | <input checked="" type="checkbox"/> | Flow cytometry         |
| <input checked="" type="checkbox"/> | <input type="checkbox"/>            | MRI-based neuroimaging |

## Antibodies

### Antibodies used

anti-CD16/32 (clone: 93, Cat: 101319, Lot: B247951, Biolegend, 1:100), anti-PD-L1 (PE-cy7, clone: 10F.9G2, Cat: 124313, Lot: B249444, Biolegend; Clone: MHI5, eBioscience, 1:100), anti-IgG2a-Fc (APC, Cat: 31983, Lot: TL2686983, Thermo, 1:500), anti-CD45 (clone: 30-F11, BV421, Cat: 103133, Lot: B229121, Biolegend, or PE, Cat: 12-0451-82, Lot: E013632, eBioscience, 1:500), anti-CD11c (clone: HL3, PE, Cat: 553802, Lot: 50586, BD Biosciences; or APC, Cat: 117310, Lot: B166840, Biolegend, 1:100), anti-CD11b (clone: M1/70, eF450, Cat: 48-0112-82, Lot: E10253-1631, eBioscience; or PE-cy5, Cat: 101209, Lot: B260952, Biolegend, 1:100), anti-CD103 (FITC, clone: 2E7, Cat: 121419, Lot: B213630, Biolegend, 1:100), viability dye (BV510, REF: 13-0870-T100, Lot: D0870061416133 or UV450, REF: 13-0868-T100, Lot: D0868010416133, Tonbo Biosciences, 1:1000), anti-CD3 (Pacific Blue, clone: 17A2, Biolegend, Cat: 100203, 1:1000), anti-CD4 (clone: RM4-5, PE, Cat: 553730, Lot: 47561, BD Biosciences, or PE-cy5, REF: 15-0041-82, Lot: E06071-1631, eBioscience, 1:500), anti-CD8 (FITC, Cat: 100705, Lot: B217241; APC, Cat: 100711, Lot: B22411, or APC-cy7, Cat: 100713, Lot: B237525, clone: 53-6.7, Biolegend, 1:1000), anti-Gr-1 (PE, Cat: 553128, Lot: 29290; APC-cy7, Cat: 557661, Lot: 55732, BD biosciences, clone: RB6-8C5, Biolegend, 1:100), MHCII (clone: M5/114.15.2, FITC, Cat: REF: 11-5322-81, Lot: 4287995, eBioscience or PE, Cat: 557000, Lot: 60577, BD Biosciences, 1:100), anti-FoxP3 (PE, Cat: 12-5773-80, Lot: E01763-1631 or FITC, Cat: 11-5773-82, Lot: E031743, clone: FJK-16s, eBioscience, 1:100), anti-IFN- $\gamma$  (APC, clone: XMG1.2, Cat: 554413, Lot: 73070, BD biosciences, 1:100), anti-107a (PE-cy7, Cat: 560647, Lot: 6326658, clone: 1D4B, BD biosciences, 1:500), anti-TNF $\alpha$  (PE, clone: MP6-XT22, Cat: 554419, Lot: 4059871, BD Biosciences, 1:100), anti-IL-2 (PE, Cat: 561061, Lot: 5295812, clone: JES6-5H4, BD Biosciences, 1:100), anti-IL-12 (PE-cy7, Cat: 505209, clone: C15.6, Biolegend, 1:100), anti-CD80 (FITC, Cat: 553768, Lot: 09530, clone: 16-10A1, BD Biosciences, 1:100), anti-CD86 (APC, Cat: 558703, Lot: 33261, clone: GL-1, BD Biosciences, 1:100), and anti-CD40 (PE, Cat: 553791, Lot: 0000066846, clone 3/23, BD Biosciences, 1:100). Pentamer H-2Db-ASMTNMELM-PE was provided by ProImmune Inc (F2695-2A-D) (1:100). Anti-CD40 (Cat: BP0016-2, Lot: 671717N1, BioXcell). Anti-PD-L1(clone: 10F.9G2, Cat: BE0101, Lot: 665717O1B, BioXcell). anti-CD31 (FITC, clone: 390, Cat: 102405, Biolegend, 1:100). anti-Ter119 (APC, clone: TER-119, Cat: 116211, Biolegend, 1:100). IRDye® 800CW Goat anti-Mouse IgG Secondary Antibody (Polyclonal, Cat: 926-32210, Lot: C50909-01, ). Anti-PD-1 (Clone: RMP1-30, Cat: 101319, Lot: B247951)

### Validation

Anti-CD40 (Cat: BP0016-2, Lot: 671717N1, BioXcell). Anti-PD-L1(clone: 10F.9G2, Cat: BE0101, Lot: 665717O1B, BioXcell), IRDye® 800CW Goat anti-Mouse IgG Secondary Antibodies were validated by the manufacturer western Blot assay. All the

other antibodies were validated by flow cytometry.

## Eukaryotic cell lines

Policy information about [cell lines](#)

|                                                                      |                                                                                                                                                                                                                                                                                                             |
|----------------------------------------------------------------------|-------------------------------------------------------------------------------------------------------------------------------------------------------------------------------------------------------------------------------------------------------------------------------------------------------------|
| Cell line source(s)                                                  | Human embryonic kidney cell line 293T, osteosarcoma HUTK-143B, monkey kidney fibroblasts CV1, murine adenocarcinoma Py230, murine melanoma B16-F10, Murine lymphoma EL4 were purchased from the American Type Culture Collection (ATCC). Murine colon adenocarcinoma cells MC38 was purchased from Kerafast |
| Authentication                                                       | Certificates of analysis were provided with cell line by ATCC. ATCC authenticates cell lines routinely with the following tests:<br>Short Tandem Repeat (STR) Profiling<br>Cellular Morphology<br>Karyotyping<br>Cytochrome C Oxidase I (COI) Assay Testing                                                 |
| Mycoplasma contamination                                             | All cell lines were routinely tested for mycoplasma contamination and found negative.                                                                                                                                                                                                                       |
| Commonly misidentified lines<br>(See <a href="#">ICLAC</a> register) | None                                                                                                                                                                                                                                                                                                        |

## Animals and other organisms

Policy information about [studies involving animals](#); [ARRIVE guidelines](#) recommended for reporting animal research

|                         |                                                                         |
|-------------------------|-------------------------------------------------------------------------|
| Laboratory animals      | C57BL/6 mouse, female, 7-8 weeks.                                       |
| Wild animals            | the study didn't involve wile animals                                   |
| Field-collected samples | The study didn't involve samples collected from the field               |
| Ethics oversight        | Institutional Animal Care and Use Committee of USC which IACUC approved |

Note that full information on the approval of the study protocol must also be provided in the manuscript.

## Flow Cytometry

### Plots

Confirm that:

- The axis labels state the marker and fluorochrome used (e.g. CD4-FITC).
- The axis scales are clearly visible. Include numbers along axes only for bottom left plot of group (a 'group' is an analysis of identical markers).
- All plots are contour plots with outliers or pseudocolor plots.
- A numerical value for number of cells or percentage (with statistics) is provided.

### Methodology

|                    |                                                                                                                                                                                                                                                                                                                                                                                                                                                                                                                                                                                                                                                                                                                                                                                                                                                                                                                                                                                                                                                                                                                                                                                                                                                                                                                                                                                                                                                                                                                                                                                                                                                                                                                                    |
|--------------------|------------------------------------------------------------------------------------------------------------------------------------------------------------------------------------------------------------------------------------------------------------------------------------------------------------------------------------------------------------------------------------------------------------------------------------------------------------------------------------------------------------------------------------------------------------------------------------------------------------------------------------------------------------------------------------------------------------------------------------------------------------------------------------------------------------------------------------------------------------------------------------------------------------------------------------------------------------------------------------------------------------------------------------------------------------------------------------------------------------------------------------------------------------------------------------------------------------------------------------------------------------------------------------------------------------------------------------------------------------------------------------------------------------------------------------------------------------------------------------------------------------------------------------------------------------------------------------------------------------------------------------------------------------------------------------------------------------------------------------|
| Sample preparation | For Figure 1d. Isolation of bone marrow cells – Age-matched mice were sacrificed by cervical dislocation and bones from hind legs, forelegs were isolated. Bone marrow (BM) was extracted by crushing the bones using mortar and pestle in RPMI + 2% FBS. The suspension was filtered through a 40 µm mesh and centrifuged for 5 min at 1,500 rpm. Freshly isolated bone marrow cells from mice were cultured in complete RPMI1640 media supplemented with 10% FBS, 20 ng/mL GM-CSF, and 40 ng/mL IL-4 for dendritic cell differentiation.<br>For Figure 4.<br>Mice with tumors are euthanized by CO2 asphyxiation. Using autoclaved surgical instruments rinsed with 70% ETOH, cut tumor into small (< 3mm) pieces and incubate in 5 ml dissociation solution (RPMI medium supplemented with 5% FBS, Collagenase type I (200 U/ml) and DNase I (100 µg/ml)) for 30 min at 37 °C, Pipetting (using a 1,000 µl pipet tip) and vortexing every 10 minutes during the incubation. If myeloid cells will be subsequently isolated, substitute 5% FBS and Collagenase type I with 10% FBS and Collagenase type IV (200 U/ml), respectively. Splenic cells were obtained by physical dissociation of the spleen on a cell strainer. After incubation, pass cell suspension through a 70 µm cell strainer and wash twice with 10 ml PBS buffer for staining. Cells were blocked with Fc blocking reagent, and then stained with antibody cocktail for 30 min on ice. If intracellular staining was performed, BD Cytofix/Cytoperm Fixation and Permeabilization Solution was used according to the manufacturer's manual. Counting beads (San diego, biolegend) were added in the final cell suspension to quantify cells when necessary. |
| Instrument         | BD canto II, BD arialll                                                                                                                                                                                                                                                                                                                                                                                                                                                                                                                                                                                                                                                                                                                                                                                                                                                                                                                                                                                                                                                                                                                                                                                                                                                                                                                                                                                                                                                                                                                                                                                                                                                                                                            |
| Software           | Collection: FACS DIVA<br>analysis: Flowjo 10.4.0                                                                                                                                                                                                                                                                                                                                                                                                                                                                                                                                                                                                                                                                                                                                                                                                                                                                                                                                                                                                                                                                                                                                                                                                                                                                                                                                                                                                                                                                                                                                                                                                                                                                                   |

Cell population abundance

Purity of post-sort fractions is regularly measured by flow for CD8+ and purity was >95%

Gating strategy

Starting cells were gated on a linear FSC/SSC plot, and then negative population in viability stain lower than  $10^3$  was selected as live cells for the following gating which was shown in all flow figures. Positive/negative populations were determined by FMO controls

Tick this box to confirm that a figure exemplifying the gating strategy is provided in the Supplementary Information.
